# Supplementary material for: Agricultural land-uses consistently exacerbate infectious disease risks in Southeast Asia
Source: PubMed Central journal article supplement (PMC6754503; doi:10.1038/s41467-019-12333-z), 2019-09-20
Supplement: 41467_2019_12333_MOESM4_ESM.pdf [file 41467_2019_12333_MOESM4_ESM.pdf]

### Description of Additional Supplementary Files

#### File Name Supplementary Information Dataset 1

Description: Supplementary Data 1 gives the raw data used in all analyses. Below is a table which is a data key that describes the type of data in each column.

| <u>Column Name</u>     | <u>Variable Description</u>                                                                                                                                                                                                                         |
|------------------------|-----------------------------------------------------------------------------------------------------------------------------------------------------------------------------------------------------------------------------------------------------|
| Author                 | The name of the first author of the study.                                                                                                                                                                                                          |
| Year                   | The year the study was published.                                                                                                                                                                                                                   |
| Rural/Urban            | Whether the study location was rural or urban. Responses can be Rural, Urban or National Level Data.                                                                                                                                                |
| Children in population | Whether children were included in the total population. Binary response of Yes or No.                                                                                                                                                               |
| Gender breakdown       | What was the gender breakdown of the population? Majority Male = more than 60% of the population was male. Majority Female = more than 60% of the population was female. Equal = 50% of the population was male and 50% was female.                 |
| Country                | The country the study was conducted in.                                                                                                                                                                                                             |
| Sampling type          | The type of sampling conducted. Random denotes random sampling. Purposive denotes purposive sampling.                                                                                                                                               |
| Outcome measurement    | How was prevalence, seroprevalence or incidence measured. This is a binary variable which could be laboratory or clinical. Laboratory = outcome is measured using a laboratory test. Clinical = the outcome is measured using a clinical diagnosis. |
| Study type             | The type of epidemiological study conducted.                                                                                                                                                                                                        |
| Study Quality          | This is based on the National Heart, Lung, and Blood Institute (NHLBI) study quality tool for case control and cross-sectional studies. Studies are evaluated as Good, Fair or Poor.                                                                |
| Exposure               | This is the type of agricultural exposure.                                                                                                                                                                                                          |
| Comparator             | The type of comparator                                                                                                                                                                                                                              |
| Disease                | The type of disease                                                                                                                                                                                                                                 |
| caseexpyes             | The total number of people who are exposed and are infected by a pathogen.                                                                                                                                                                          |
| caseexpno              | The total number of people who are exposed and are not infected by a pathogen. (Cell C in the OR framework below)                                                                                                                                   |
| controlexpyes          | The total number of people who are not exposed and are infected by a pathogen. (Cell B in the OR framework below)                                                                                                                                   |
| controlexpno           | The total number of people who are not exposed and are not infected by a pathogen. (Cell B in the OR framework below)                                                                                                                               |

|                                 |                                                                                                                |
|---------------------------------|----------------------------------------------------------------------------------------------------------------|
| Log odds ratio                  | The log of the crude odds ratio                                                                                |
| Sampling variance               | Spread or variability of the sample estimate                                                                   |
| Bacterial                       | Binary response on whether the disease can be classed as a Bacterial Agent                                     |
| Parasite                        | Binary response on whether the disease can be classed as a Parasitic Agent                                     |
| Vector-Borne                    | Binary response on whether the disease can be classed as a Vector-Borne Agent                                  |
| Zoonotic                        | Binary response on whether the disease can be classed as a Zoonotic Agent                                      |
| Virus                           | Binary response on whether the disease can be classed as a Viral Agent                                         |
| Regional meta-analysis          | Binary response which indicates which studies were included within the regional meta-analysis                  |
| Study Characteristics Subgroups | Binary response which indicates which studies were included within the study characteristics subgroup analysis |
| Exposure Based Subgroups        | Binary response which indicates which studies were included within the exposure-based subgroup analysis        |
| Disease Based Subgroups         | Binary response which indicates which studies were included within the disease-based subgroup analysis         |

OR FRAMEWORK

|              |     |                   |              |
|--------------|-----|-------------------|--------------|
| OR Framework |     | Diseased/Infected |              |
|              |     | Yes               | No           |
| Exposed      | Yes | caseexpyes        | caseexpno    |
|              | No  | controlexpyes     | controlexpno |

Here is an example of the framework used to calculate crude odds ratios.
